# Supplementary material for: Schriftelijk rapporteren: een onderschatte kerntaak in de hulpverlening
Source: Royal Society of Chemistry journal article supplement (doi:10.1039/c8an00016f), 2010-01-01
Supplement: c8an00016f1.pdf [file c8an00016f1.pdf]

## Supporting Information for:

### Three-dimensional direct visualization of silica dispersion in polymer-based composites

Zemin Feng,<sup>a</sup> Jinpan Zhong,<sup>a</sup> Weijiang Guan,<sup>a</sup> Rui Tian,<sup>\*a</sup> Chao Lu<sup>\*a</sup> and Caifeng Ding<sup>b</sup>

*<sup>a</sup>State Key Laboratory of Chemical Resource Engineering, Beijing University of Chemical Technology, Beijing 100029, China*

*<sup>b</sup>State Key Laboratory of Sensor Analysis of Tumor Marker, Qingdao University of Science and Technology, Qingdao 266061, China.*

*\*E-mail: tianrui@mail.buct.edu.cn, luchao@mail.buct.edu.cn*

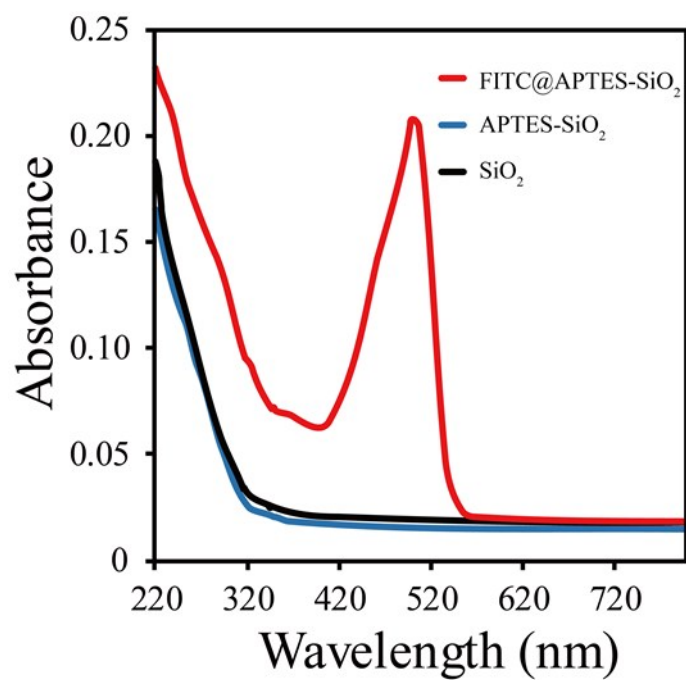

**Fig. S1** UV–Vis absorbance spectra of SiO<sub>2</sub>, APTES-modified SiO<sub>2</sub> and FITC@APTES-modified SiO<sub>2</sub> powder.

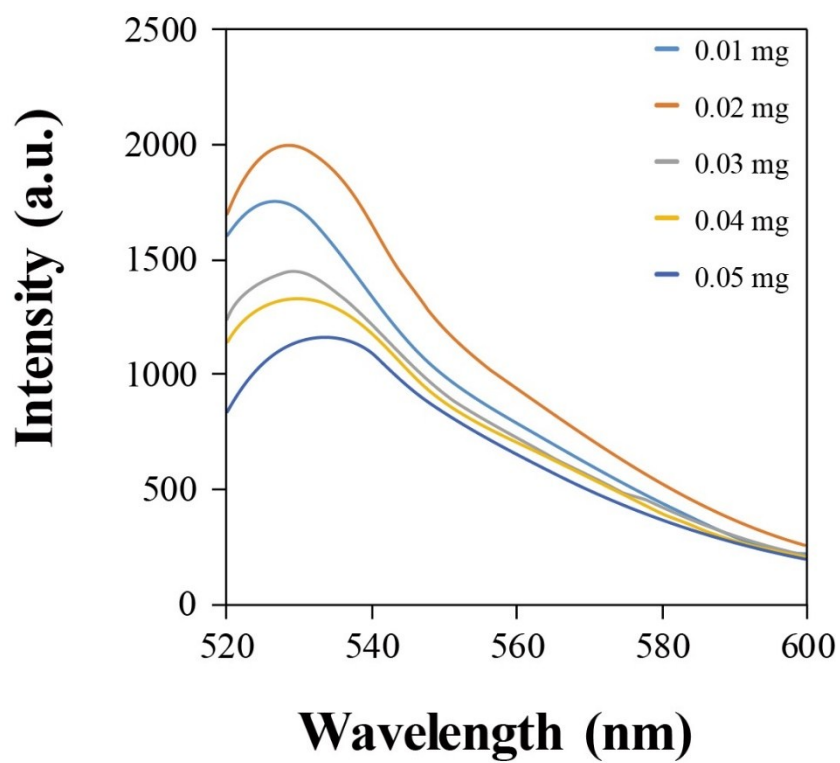

**Fig. S2** Fluorescence spectra of FITC@APTES-modified SiO<sub>2</sub> in the presence of different FITC amount.

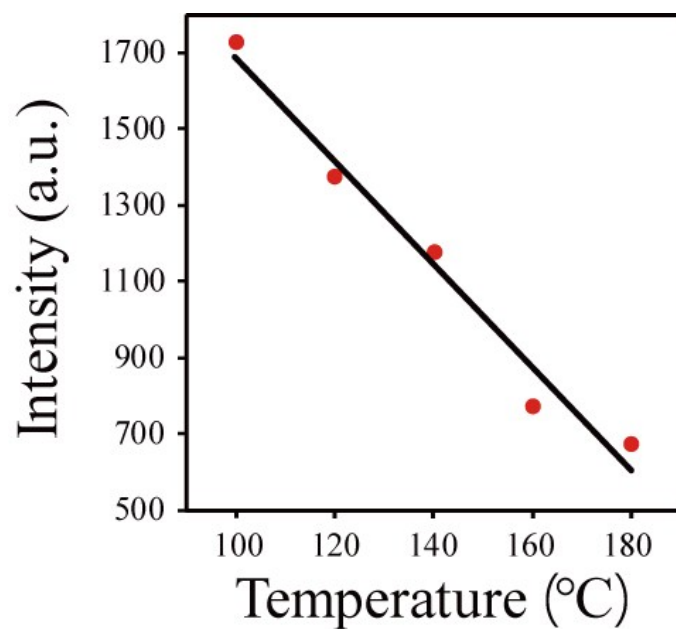

**Fig. S3** Fluorescence intensity of FITC@APTES-modified SiO<sub>2</sub> at different temperature.

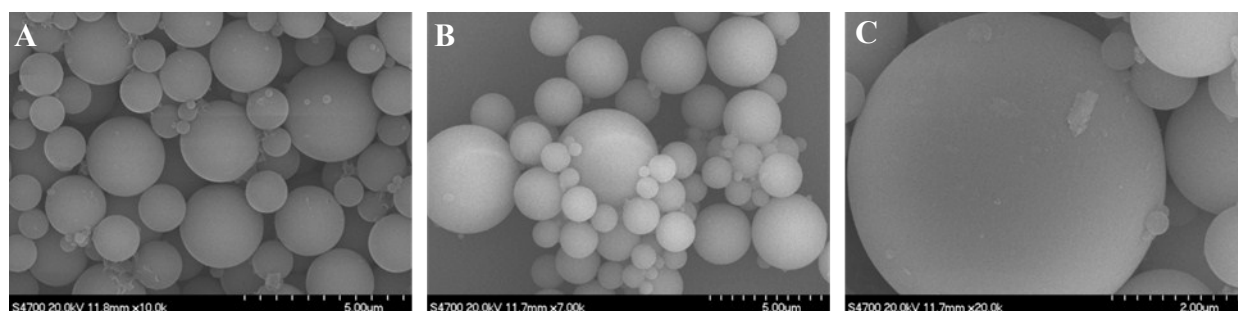

**Fig. S4** SEM images of (A) SiO<sub>2</sub>, (B) APTES-modified SiO<sub>2</sub>, and (C) FITC@APTES-modified SiO<sub>2</sub> powder.

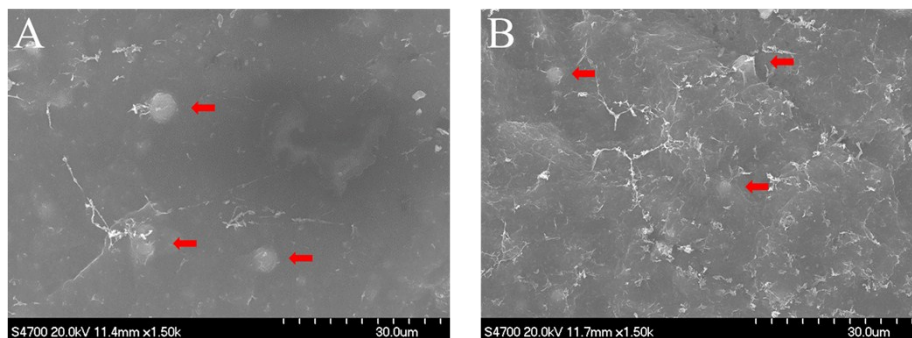

**Fig. S5** SEM images on cross sections of (A) FITC@APTES-modified SiO<sub>2</sub> and (B) APTES-modified SiO<sub>2</sub> (3%) silicone composites.

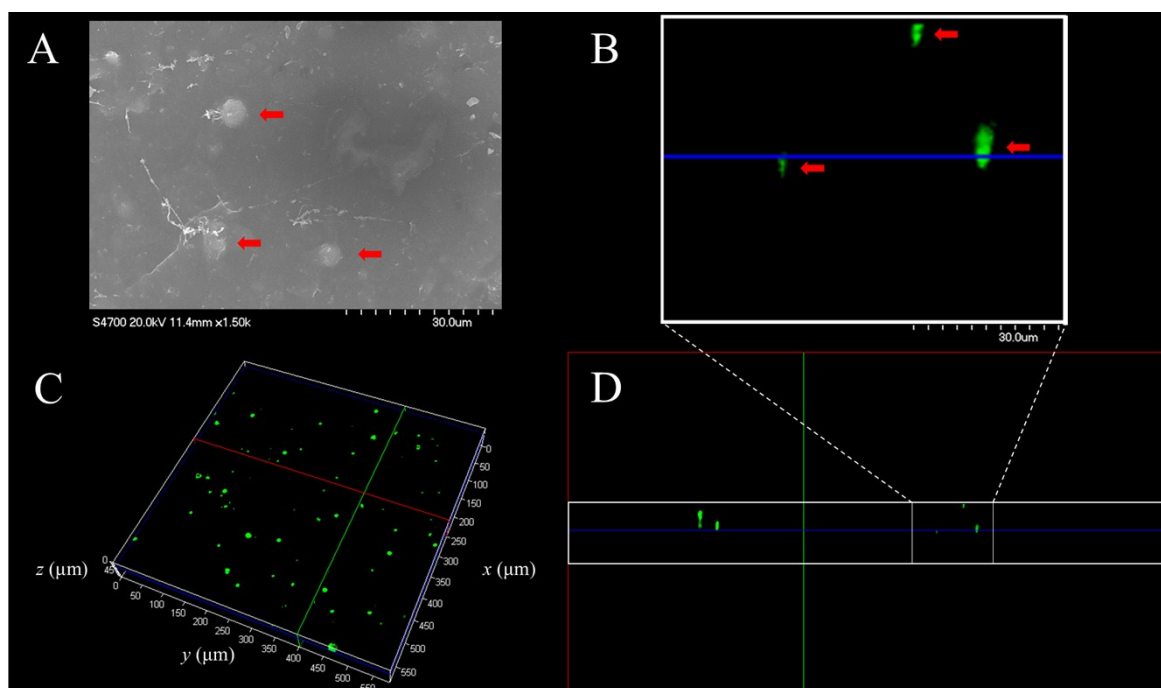

**Fig. S6** The comparison of CLSM and SEM images on a cross section of FITC@APTES-modified SiO<sub>2</sub> (3%) silicone composite.
